# Supplementary material
Source: PubMed Central journal article supplement (PMC7301859)
Supplement: AEM.00696-20-s0001.pdf [file AEM.00696-20-s0001.pdf]

**Table S1** Genomes of *Trichoderma* spp. used in the present *in silico* work

| Strains <sup>a</sup>                            | Genome ID <sup>b</sup> | References |
|-------------------------------------------------|------------------------|------------|
| <i>Trichoderma</i> cf. <i>afroharzianum</i> T22 | (1185335)              | -          |
| <i>T. arundinaceum</i> IBT 40837                | GCA_003012105.1        | (1)        |
| <i>T. asperellum</i> B05                        | GCA_000733085.2        | (2)        |
| <i>T. asperellum</i> CBS 433.97                 | GCA_003025105.1        | (3)        |
| <i>T. atrobrunneum</i> ITEM 908                 | GCA_003439915.1        | (2)        |
| <i>T. atroviride</i> B10                        | (1185343)              | -          |
| <i>T. atroviride</i> IMI 206040                 | GCA_000171015.2        | (4)        |
| <i>T. atroviride</i> JCM 9410                   | GCA_001599035.1        | (2)        |
| <i>T. cf. atroviride</i> LY357                  | GCA_002916895.1        | -          |
| <i>T. atroviride</i> XS2015                     | GCA_000963795.1        | (5)        |
| <i>T. brevicompactum</i> IBT 40841              | GCA_003012085.1        | (1)        |
| <i>T. citrinoviride</i> TUCIM 6016              | GCA_003025115.1        | (3)        |
| <i>T. gamsii</i> A5MH                           | GCA_002894205.1        | -          |
| <i>T. gamsii</i> T6085                          | GCA_001481775.2        | (6)        |
| <i>T. guizhouense</i> NJAU 4742                 | GCA_002022785.1        | (3)        |
| <i>T. hamatum</i> GD12                          | GCA_000331835.2        | (7)        |
| <i>T. harzianum</i> B97                         | GCA_001990665.1        | (8)        |
| <i>T. harzianum</i> CBS 226.95                  | GCA_003025095.1        | (3)        |
| <i>T. cf. harzianum</i> M10                     | (1185333)              | -          |
| <i>T. cf. afroharzianum</i> T6776               | GCA_000988865.1        | (9)        |
| <i>T. cf. pleuroti</i> Tr1                      | GCA_002894145.1        | -          |
| <i>T. harzianum</i> TR274                       | GCA_002838845.1        | (10)       |
| <i>T. cf. longibrachiatum</i> JCM 1883          | GCA_001950475.1        | (2)        |
| <i>T. koningiopsis</i> POS7                     | GCA_002246955.1        | (11)       |
| <i>T. longibrachiatum</i> ATCC 18648            | GCA_003025155.1        | (3)        |
| <i>T. longibrachiatum</i> MK1                   | (1185339)              | -          |

|                                   |                 |          |
|-----------------------------------|-----------------|----------|
| <i>T. longibrachiatum</i> SMF2    | GCA_000332775.1 | (12)     |
| <i>T. parareesei</i> CBS 125925   | GCA_001050175.1 | (13, 14) |
| <i>T. pleuroti</i> TPhu1          | GCA_001721665.1 | (2)      |
| <i>T. reesei</i> CBS 999.97       | GCA_001999515.1 | (15)     |
| <i>T. reesei</i> QM6a             | GCA_000167675.2 | (16)     |
| <i>T. reesei</i> SS-II            | GCA_004762065.1 | (17)     |
| <i>T. cf. harzianum</i> IMV 00454 | GCA_001931985.1 | (2)      |
| <i>T. virens</i> FT-333           | GCA_000800515.1 | (2)      |
| <i>T. virens</i> Gv29-8           | GCA_000170995.2 | (4, 14)  |
| <i>T. cf. virens</i> IMI 304061   | GCA_001835465.1 | (18)     |
| <i>T. cf. virens</i> Tv-1511      | GCA_007896495.1 | -        |

<sup>a</sup>The following strains including *T. harzianum* T22, *T. atroviride* LY357, *T. harzianum* T6776, *T. harzianum* M10, *T. harzianum* Tr1, *T. koningii* JCM 1883, *T. sp.* IMV 00454, *T. virens* IMI 304061 and *T. viride* Tv-1511 were manually updated for the putative right species identification based on the multilocus phylogram of *Trichoderma* spp. (Cai et al., unpublished data). <sup>b</sup>IDs of the genomes deposited in the Joint Genome Institute (JGI) database were bracketed, otherwise were given as in the National Centre for Biotechnology Information (NCBI) database.

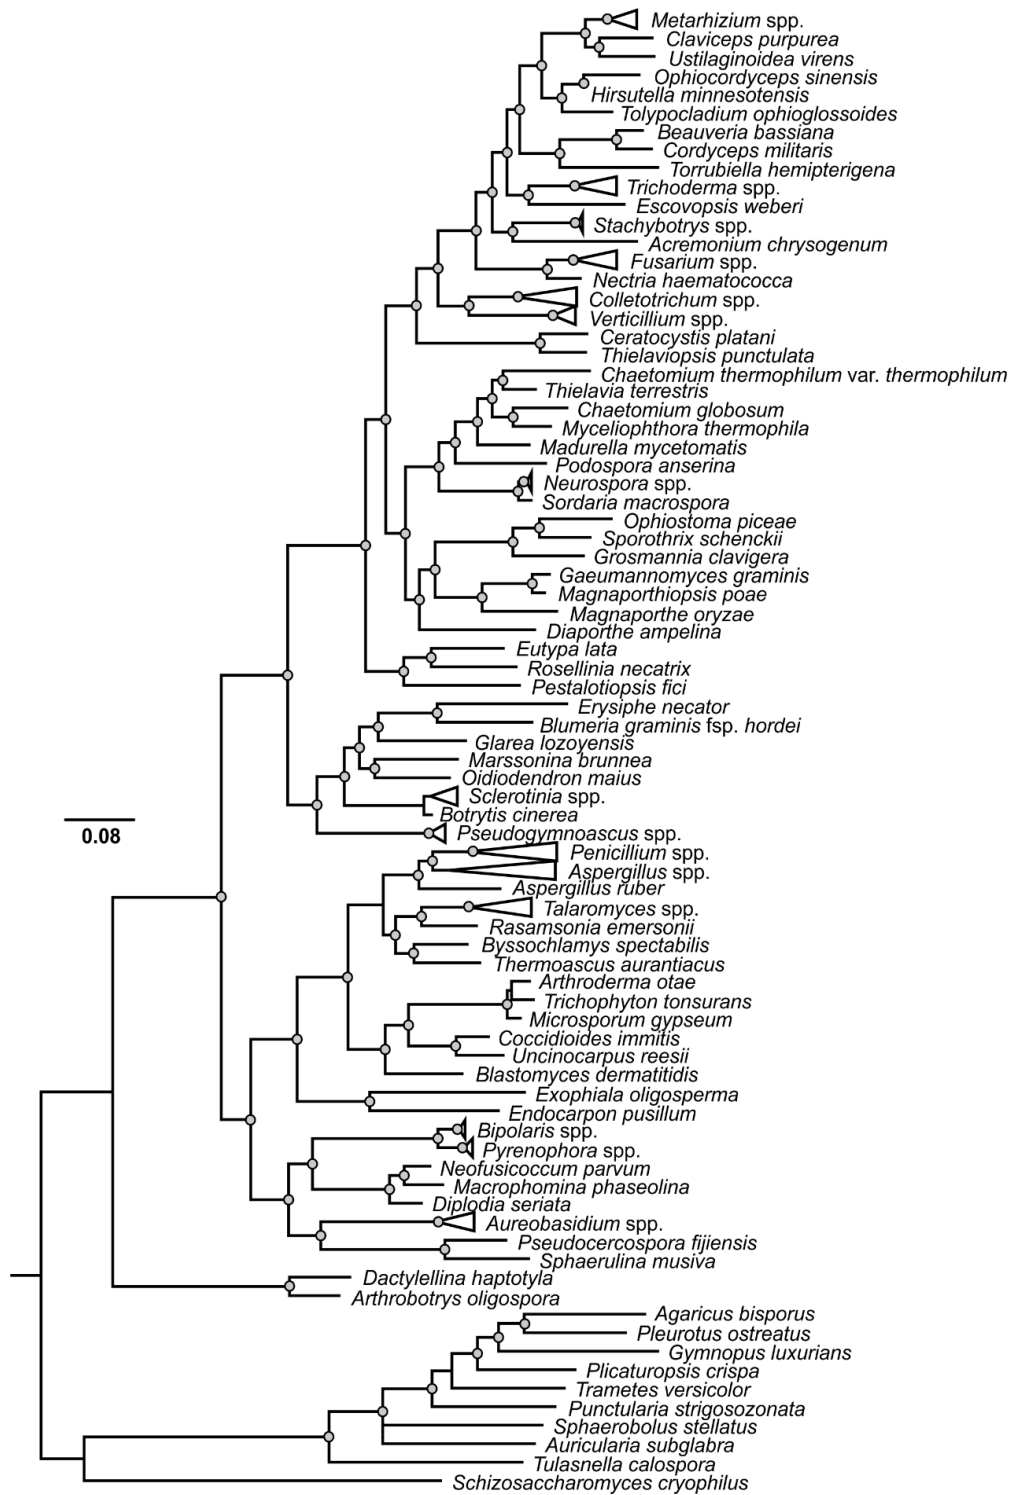

**Fig. S1** Multilocus maximum likelihood (ML) phylogram of Hypocreales and the representative Dikarya fungi. Genera containing multiple species were collapsed and represented by the genus name. The ML species tree was constructed by IQ-TREE 1.6.12 (N=1000) based on the concatenated alignment of four nuclear genes (histone acetyltransferase subunit of the RNA polymerase II holoenzyme, FG533; NAD-dependent glutamate dehydrogenase, FG570;

translation initiation factor eIF-5, FG832; and TSR1p, a protein required for processing of 20S pre-rRNA, MS277) described in Druzhinina et al. (3). Circles above nodes indicate the IQ-TREE ultrafast bootstrap values >95.

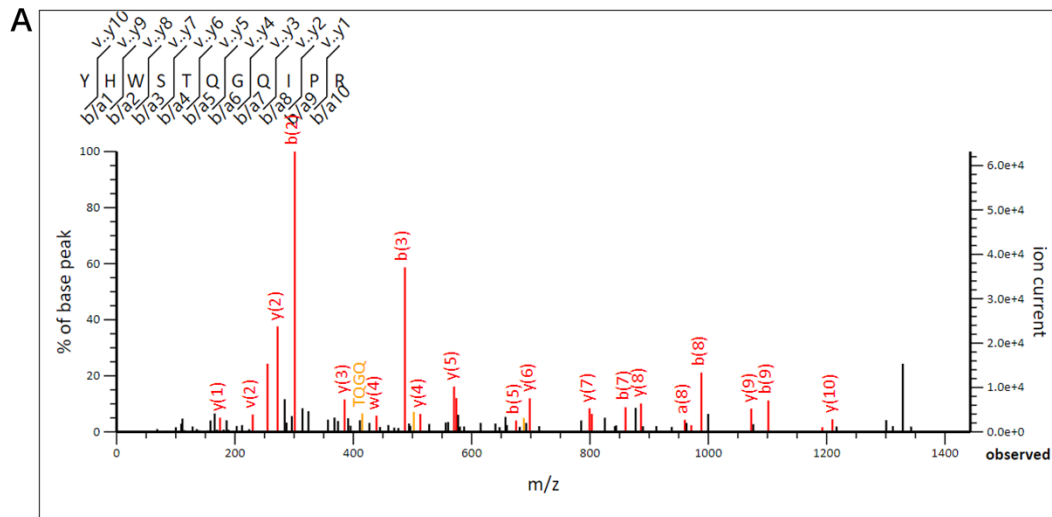

**Fig. S2** The representative MS/MS fragmentation (**A**) of the most prominent tryptic peptide originated from the sample band (see Fig. 1) and its matched amino acid sequence (**B**) on EPL1 (GenBank: OPB44018) of *T. guizhouense* NJAU 4742 (3, 14). The matched peptide is shown in red. The signal peptide predicted by SignalP 4.1 (<http://www.cbs.dtu.dk/services/SignalP/>) is underlined.

File S1 Data regarding CPs of *T. harzianum* generated in this study

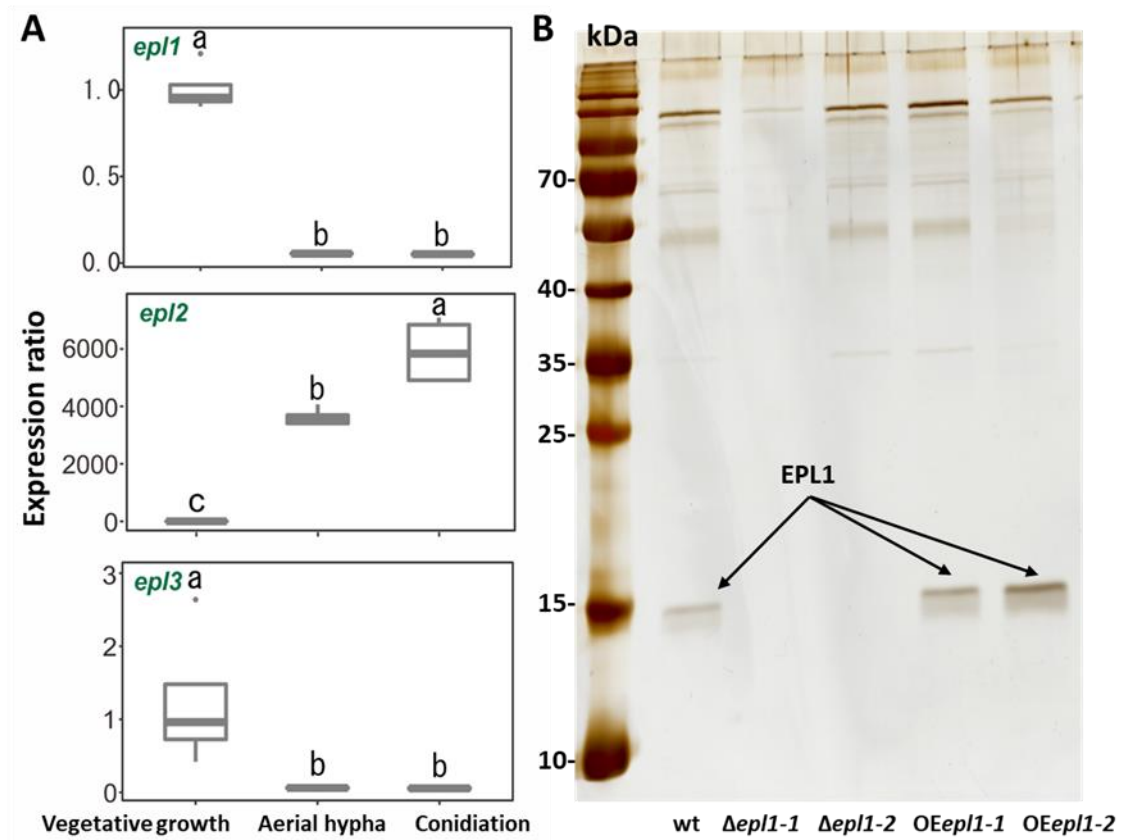

**Figure S1.1** Transcriptional determination of CPs in *T. harzianum* CBS 226.95 and proteomic assay for its *epl1* mutants. **A**, expression dynamics of *epls* at the three developmental stages of the fungus: submerged vegetative growth, aerial hypha formation, and conidiation; **B**, silver stained sodium dodecyl sulfate-polyacrylamide gel electrophoresis (SDS-PAGE) of the culture filtrates of *T. harzianum* strains cultivated in 30% MS medium (including 1% glucose, MSG) at 25 °C (170 rpm) for 72 h. wt, represents the wild type strain of *T. harzianum* CBS 226.95;  $\Delta epl1$ , represents *epl1*-deleted mutants; OE*epl1*, represents mutants overexpressing *epl1*. PageRuler™ Prestained Protein Ladder (Fermentas, USA) was used in the gel electrophoresis.

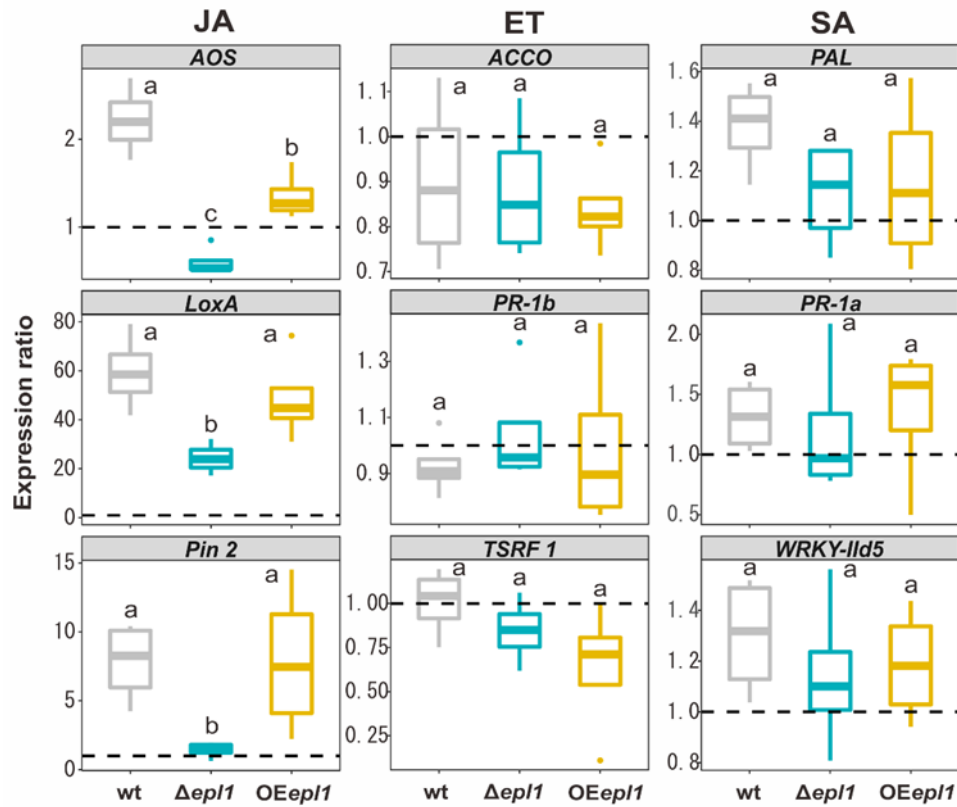

**Figure S1.2** Immune response of tomato seedlings to *T. harzianum* colonization. JA, jasmonic acid-mediated signaling pathway; ET, ethylene-mediated signaling pathway; and SA, salicylic acid-mediated signaling pathway. Expression ratio of the immune defense genes is the fold change calculated using the  $2^{-\Delta\Delta Ct}$  method ( $n=12$ ) relative to the control sample that was not colonized by *T. harzianum* CBS 226.95. PGK gene was used as the internal housekeeping gene. The dashed line represents the expression rate of the corresponding gene in the control samples grown *T. harzianum*. Boxes without a same letter indicate a significant difference at  $p < 0.05$  (Tukey multiple comparison test).

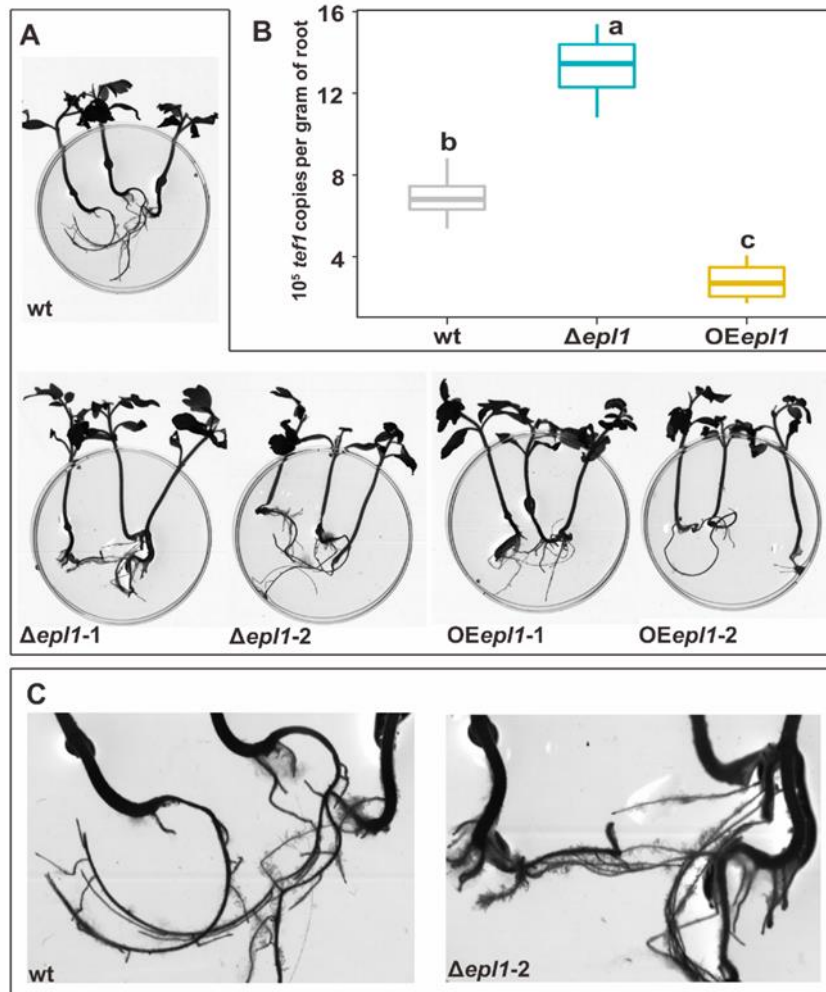

**Figure S1.3** Quantitative determination of *T. harzianum* colonization on tomato roots. **A**, scanned images of tomato seedlings colonized by *T. harzianum*. Diameter of Petri plate is 6 cm. **B**, a box plot showing the quantification of *T. harzianum tef1* gene copies per gram of root. The values were obtained by RT-qPCR with isolated RNA from the roots ( $n \geq 4$ ). Boxes without a same letter indicate a significant difference at  $p < 0.05$  (Tukey multiple comparison test). **C**, a magnified field of the roots colonized by the wild type strain of *T. harzianum* CBS 226.95 (left) and its *ep1*-deleted mutant (right).



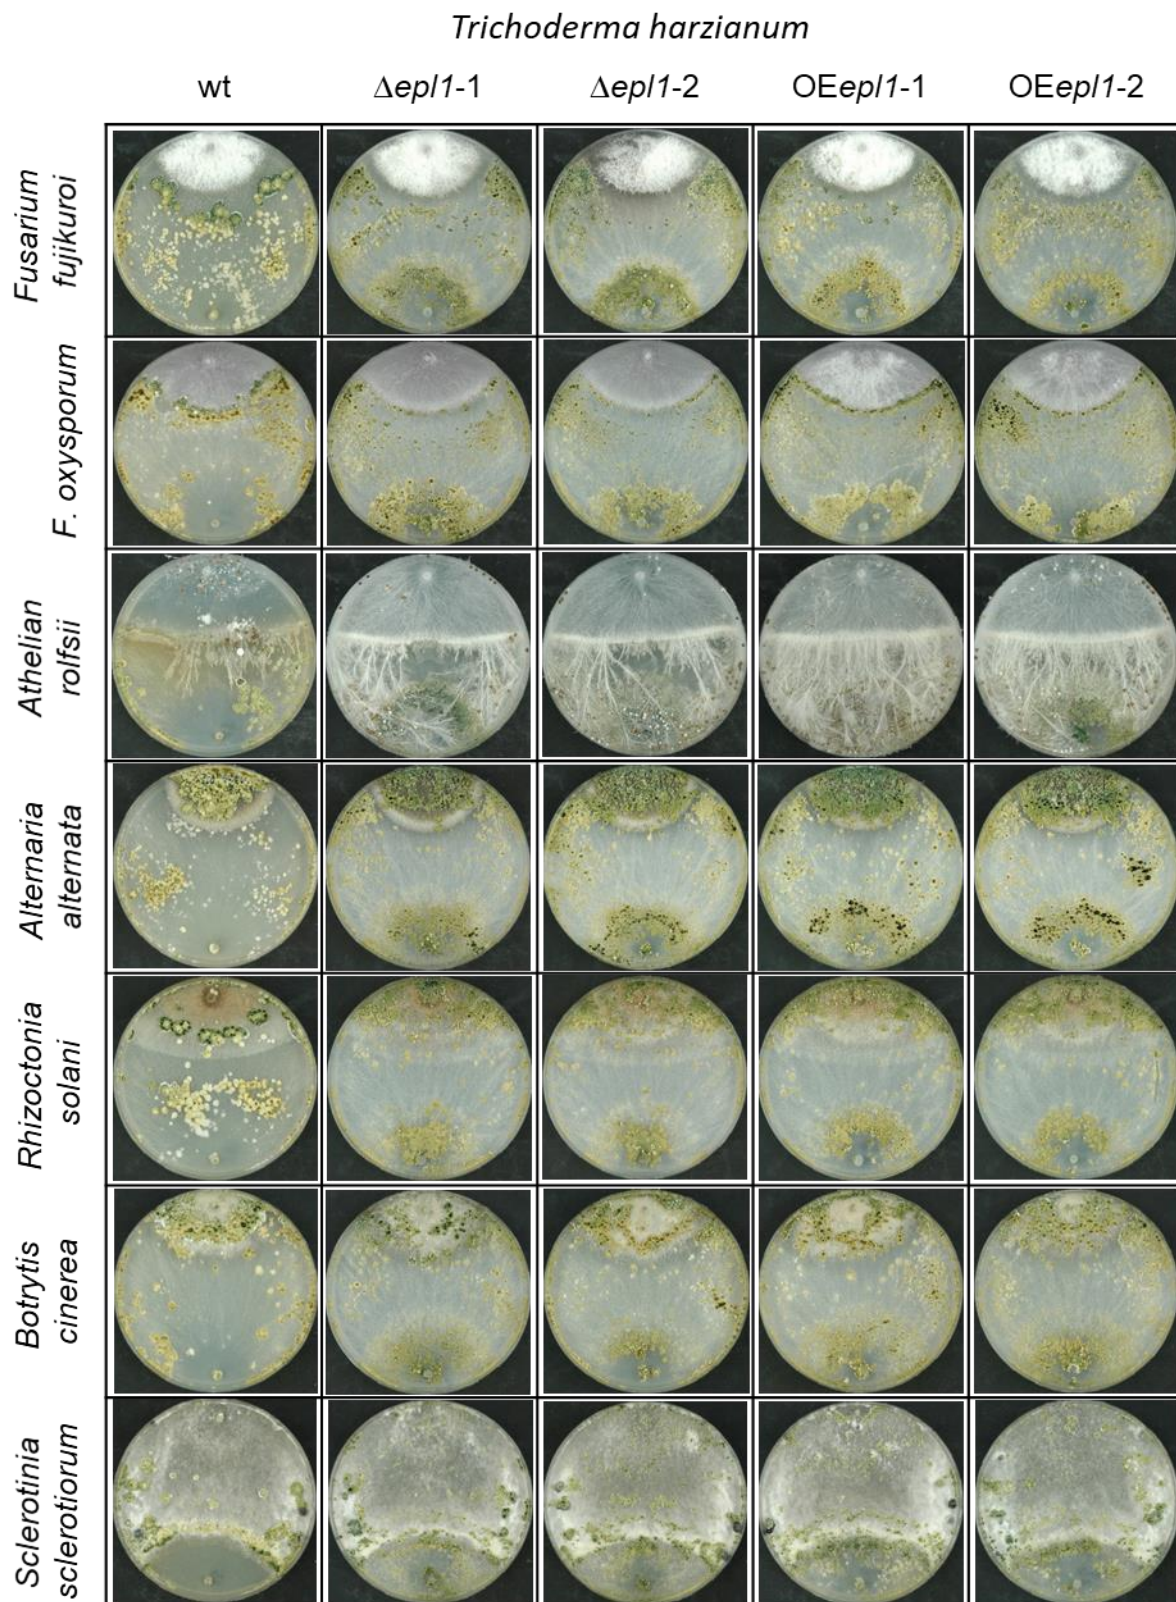

**Figure S1.4** Dual confrontation assay between *T. harzianum* and other fungi.

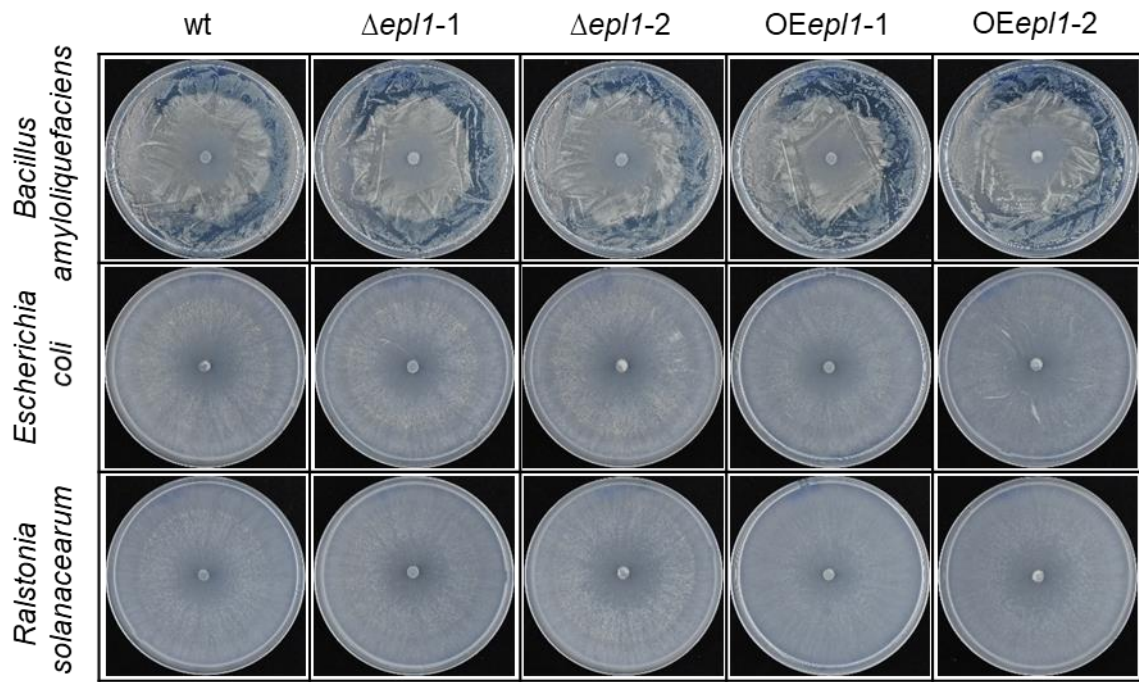

**Figure S1.5** Fungal-bacterial interaction between *T. harzianum* and three bacteria from three genera.

**File S2** Detailed procedures of mutant construction

**Text S2.1 Construction of *ep1*-deletion mutants of *Trichoderma* spp.**

The vector for *ep1* gene deletion was constructed as shown in **Figure S2.1** by overlapping PCR (see primers in **Table 4**). The *ep1* gene was designed to be replaced by the *hph* cassette. Hygromycin B-resistant transformants were first screened for the presence of the marker (*hph*) right at the downstream of the 5' flanking arm by using the primer pair F2 and R2. The positive ones were then screened for the occurrence of homologous recombination by using the primer pair F4 and R4. Positive mutants were purified by the method of single spore isolation and confirmed for the absence of the target gene by using the primer pair F3 and R3. The PCR results of two randomly selected *ep1* deletion ( $\Delta ep1$ ) mutants are shown in **Figure S2.2**. All vectors and PCR products were confirmed by SANGER sequencing.

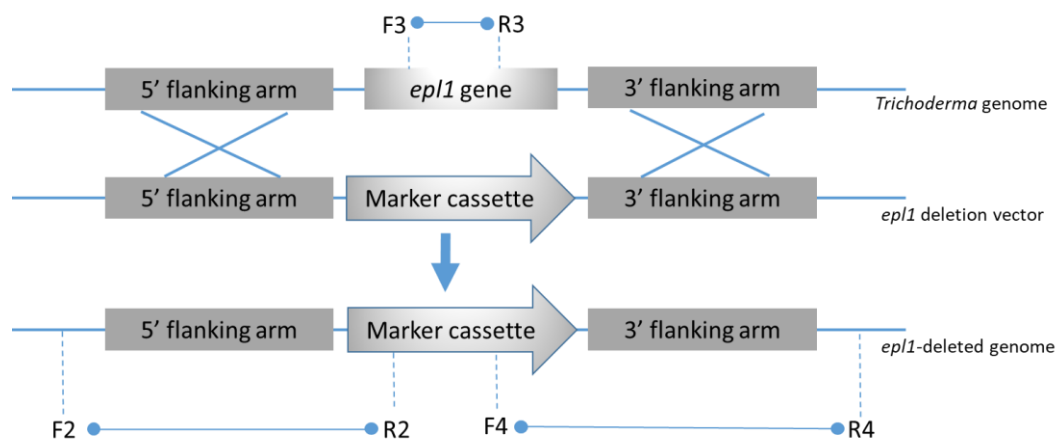

**Figure S2.1** Schematic diagram of gene deletion via homologous recombination and mutant screening.

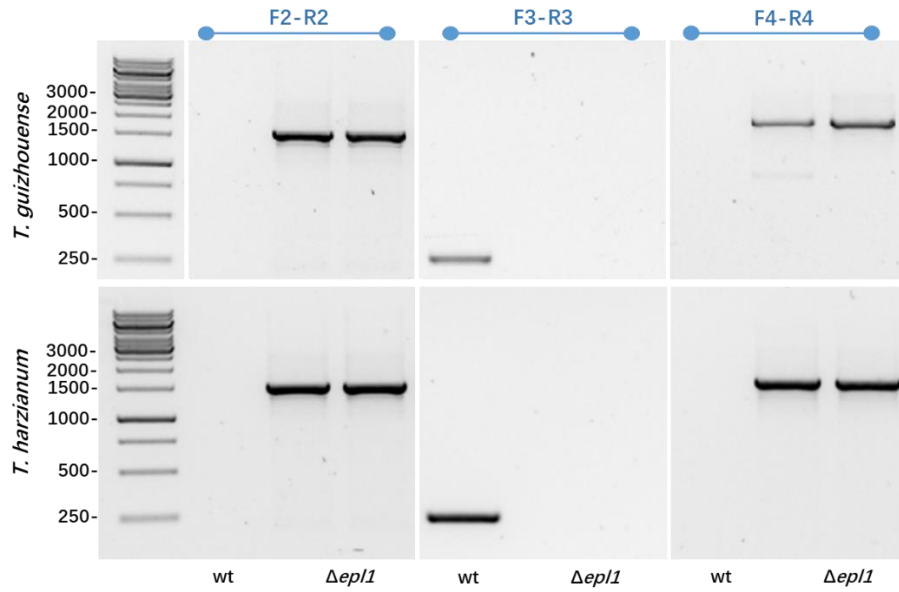

**Figure S2.2** PCR verification of the *epI1*-deletion mutants. wt represents the wild type strain of *T. guizhouense* NJAU 4742 or *T. harzianum* CBS 226.95;  $\Delta epI1$  represents the *epI1*-deleted mutants. GeneRuler 1 kb DNA Ladder (Thermo Fischer Scientific, USA) was used in the gel electrophoresis.

## Text S2.2 Construction of *ep1*-overexpression mutants of *Trichoderma* spp.

The *ep1*-overexpressing vector was constructed by cloning the open reading frame of *ep1* gene and its native terminator region (1.2 kb) to the downstream of a constitutive promoter  $P_{cnda1}$  from *T. reesei* QM6a (19), as shown in **Figure S2.3**. PCR results of two randomly selected *ep1* overexpression (OE*ep1*) mutants are shown in **Figure S2.4**.

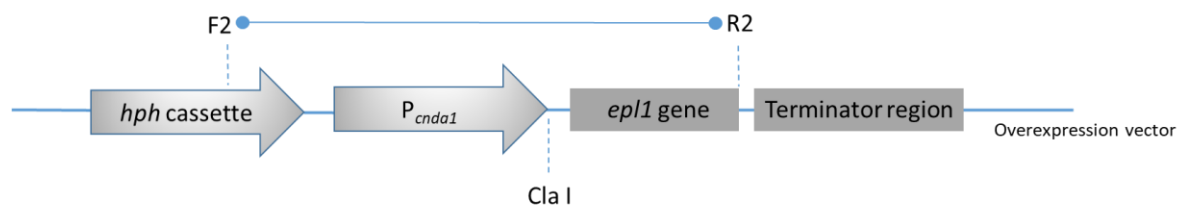

**Figure S2.3** Schematic diagram of overexpressing *ep1* under a constitutive promoter  $P_{cnda1}$  and mutant screening.

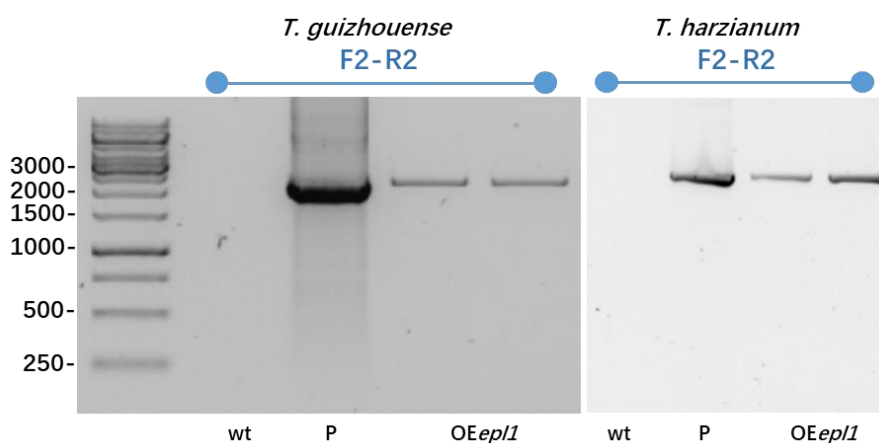

**Figure S2.4** PCR verification of *ep1* overexpressing mutants. wt, represents the wild type strain of *T. guizhouense* NJAU 4742 or *T. harzianum* CBS 226.95; OE*ep1*, represents *ep1*-overexpression mutants; P, positive control cloning from the constructed plasmid. GeneRuler 1 kb DNA Ladder (Thermo Fischer Scientific, USA) was used in the gel electrophoresis.



### Text S2.3 Construction of *epl1*-expression mutants of *Pichia pastories*

The EasySelect™ *Pichia* Expression Kit (Invitrogen, Thermo Fisher Scientific, USA) was used to express *epl1* from *T. guizhouense* NJAU 4742 in *P. pastoris* KM71H strain, according to the manufacturer's instructions. To express *epl1* with its native N-terminus, we cloned the gene flush (without the signal peptide or the intron sequences) with the Kex2 cleavage site and inserted it into position between the restriction site of Xho I and Xba I of the plasmid pPICZαA (Figure S2.5). PCR results of two randomly selected *epl1* expression ( $p_{pepl1}$ ) mutants of *P. pastoris* are shown in Figure S2.6.

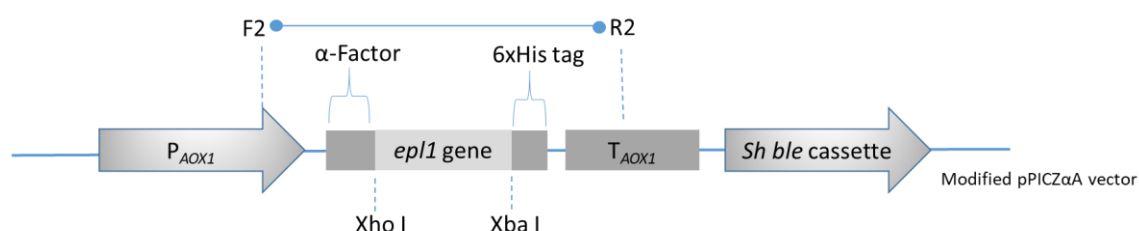

**Figure S2.5** Schematic diagram of expressing *epl1* under a methanol-inducible promoter  $P_{AOX1}$  in *P. pastoris* and mutant screening.  $\alpha$ -Factor, native *S. cerevisiae*  $\alpha$ -factor secretion signal;  $T_{AOX1}$ , native transcription termination from *AOX1* gene of *P. pastoris*; *Sh ble* cassette, *Streptoalloteichus hindustanus ble* gene driving resistance to Zeocin.

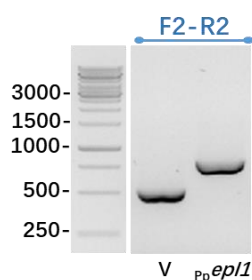

**Figure S2.6** PCR verification of mutant expressing *epl1* (from *T. guizhouense* NJAU 4742) in *P. pastoris*. V, represents mutants transformed with the original vector pPICZαA without *epl1*.  $p_{pepl1}$ , represents *Pichia* mutant transformed with the vector pPICZαA::*epl1*; GeneRuler 1 kb DNA Ladder (Thermo Fischer Scientific, USA) was used in the gel electrophoresis.

## Text S2.4 Proteomic and immune blotting verification of mutants

The proteomic verification of the *ep1*-deletion and overexpression mutants were performed by sodium dodecyl sulfate-polyacrylamide gel electrophoresis (SDS-PAGE) (**Figure S2.7**). Protein samples were collected from the *Trichoderma* culture broth by cultivating the mutants in 30% MS medium (including 1% glucose, MSG) at 25 °C (170 rpm) for 72 h. The *Pichia*-produced EPL1 ( $p_p$ EPL1) was also confirmed by SDS-PAGE and further investigated by immune blotting as described by our previous research (20). The results shown in **Figure S2.8** gave the corrected band (ca. 40 KDa) of the recombinant  $p_p$ EPL1 produced by *P. pastoris*.

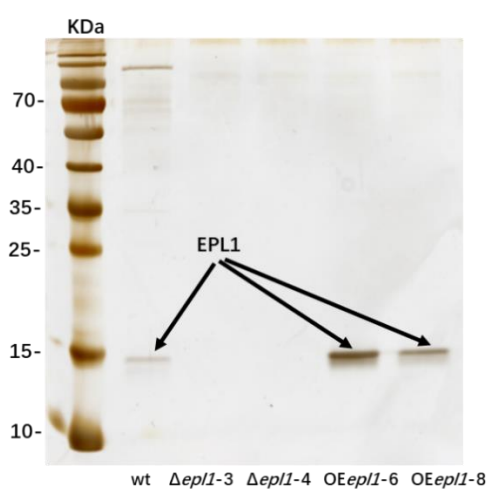

**Figure S2.7** Silver stained SDS-PAGE of *ep1* mutants of *T. guizhouense*. wt, represents the wild type strain of *T. guizhouense* NJAU 4742;  $\Delta ep1$ , represents *ep1*-deleted mutants; OE $ep1$ , represents mutants overexpressing *ep1*. PageRuler™ Prestained Protein Ladder (Fermentas, USA) was used in the gel electrophoresis.

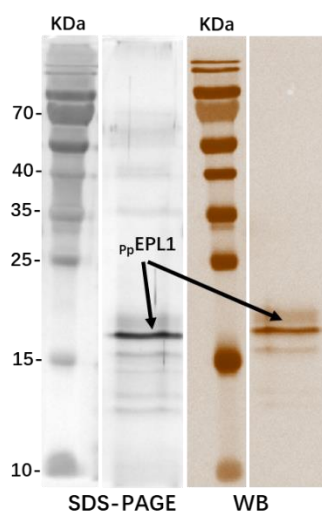

**Figure S2.8** Silver stained SDS-PAGE and Western Blot (WB) confirmation of *P. pastories* expressing EPL1 under the induction by 0.5 % methanol.  $p_{\rho}$ EPL1, represents *P. pastories* mutants producing recombinant EPL1. PageRuler™ Prestained Protein Ladder (Fermentas, USA) was used in the gel electrophoresis.



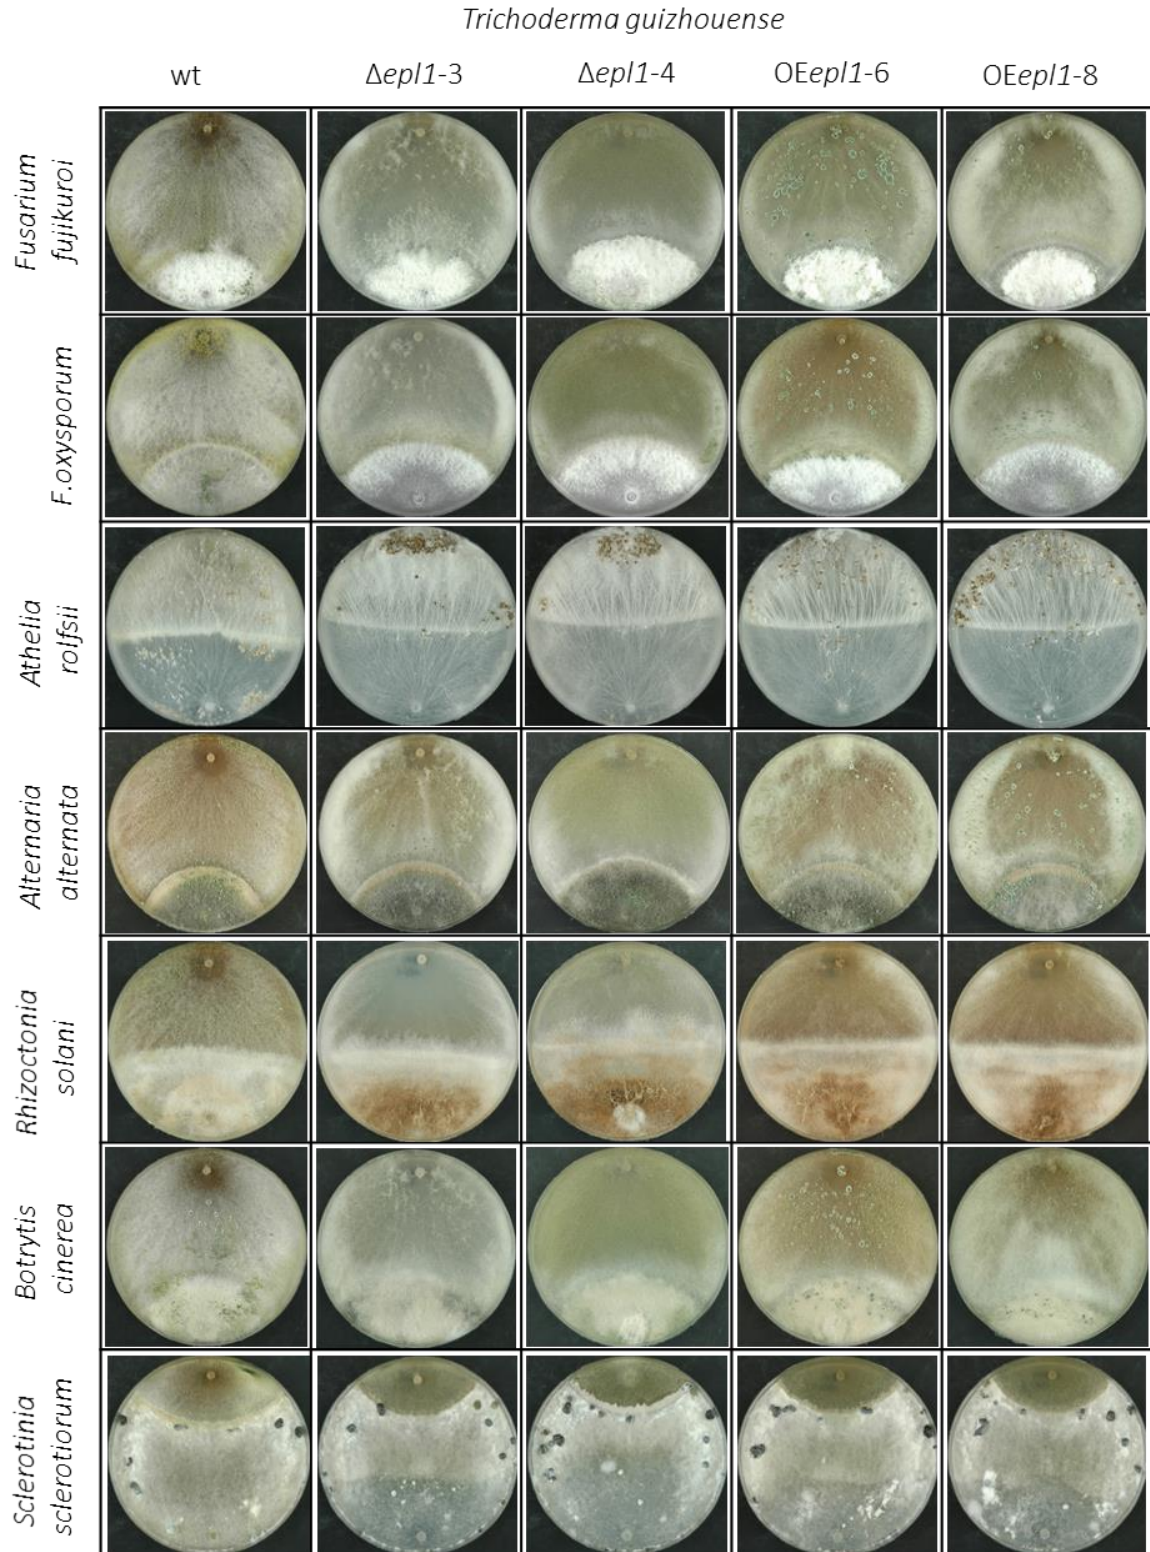

**Fig. S3** Dual confrontation assay between *T. guizhouense* and other fungi. Images were recorded after inoculation on PDA (25 °C in darkness) for 14 days. wt, represents the wild type strain of *T. guizhouense* NJAU 4742;  $\Delta ep1$ , represents the *ep1*-deleted mutants; O $Ep1$ , represents *ep1*-overexpression mutants.

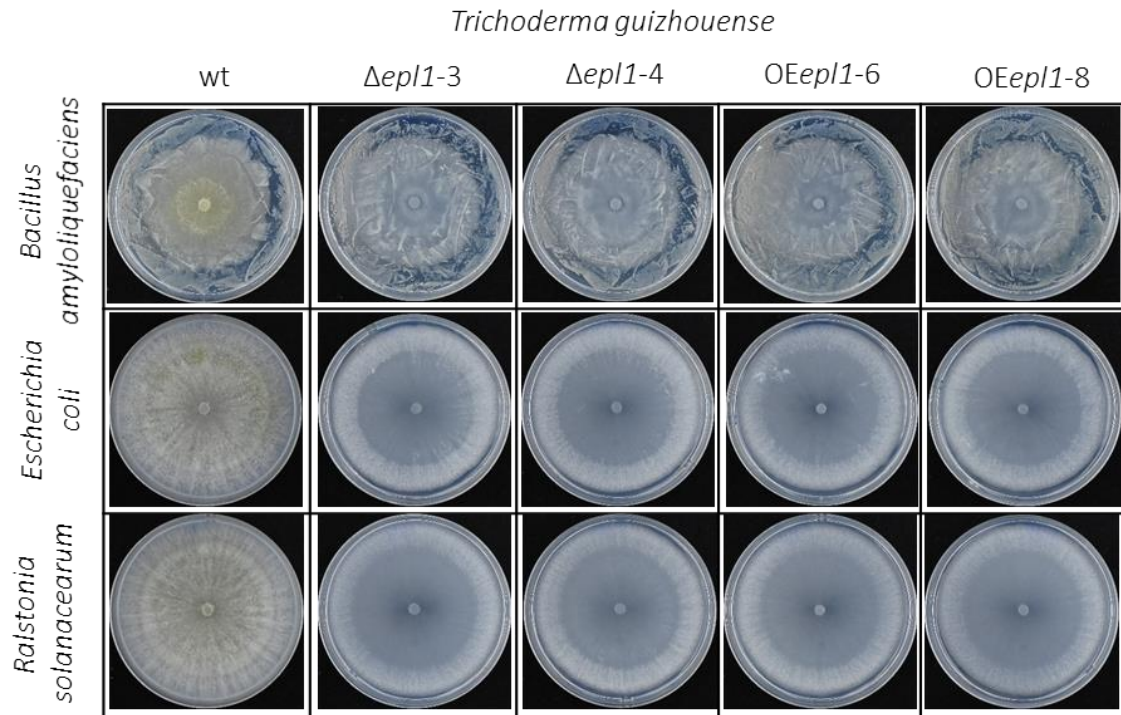

**Fig. S4** Fungal-bacterial interaction between *T. guizhouense* and three bacteria from three genera. Images were recorded after inoculation on PDA (25 °C in darkness) for 3 days. wt, represents the wild type strain of *T. guizhouense* NJAU 4742;  $\Delta epl1$ , represents the *epl1*-deleted mutants; O*Epl1*, represents *epl1*-overexpression mutants.

## References

1. Proctor RH, McCormick SP, Kim H-S, Cardoza RE, Stanley AM, Lindo L, Kelly A, Brown DW, Lee T, Vaughan MM, Alexander NJ, Busman M, Gutiérrez S. 2018. Evolution of structural diversity of trichothecenes, a family of toxins produced by plant pathogenic and entomopathogenic fungi. *PLoS Pathog* 14:e1006946.
2. Fanelli F, Liuzzi VC, Logrieco AF, Altomare C. 2018. Genomic characterization of *Trichoderma atrobrunneum* (*T. harzianum* species complex) ITEM 908: insight into the genetic endowment of a multi-target biocontrol strain. *BMC Genomics* 19:662.
3. Druzhinina IS, Chenthamara K, Zhang J, Atanasova L, Yang D, Miao Y, Rahimi MJ, Grujic M, Cai F, Pourmehdi S, Salim KA, Pretzer C, Kopchinskiy AG, Henrissat B, Kuo A, Hundley H, Wang M, Aerts A, Salamov A, Lipzen A, LaButti K, Barry K, Grigoriev IV, Shen Q, Kubicek CP. 2018. Massive lateral transfer of genes encoding plant cell wall-degrading enzymes to the mycoparasitic fungus *Trichoderma* from its plant-associated hosts. *PLoS Genet* 14:e1007322.
4. Kubicek CP, Herrera-Estrella A, Seidl-Seiboth V, Martinez DA, Druzhinina IS, Thon M, Zeilinger S, Casas-Flores S, Horwitz BA, Mukherjee PK, Mukherjee M, Kredics L, Alcaraz LD, Aerts A, Antal Z, Atanasova L, Cervantes-Badillo MG, Challacombe J, Chertkov O, McCluskey K, Coulpier F, Deshpande N, von Döhren H, Ebbole DJ, Esquivel-Naranjo EU, Fekete E, Flippi M, Glaser F, Gómez-Rodríguez EY, Gruber S, Han C, Henrissat B, Hermosa R, Hernández-Oñate M, Karaffa L, Kosti I, Le Crom S, Lindquist E, Lucas S, Lübeck M, Lübeck PS, Margeot A, Metz B, Misra M, Nevalainen H, Omann M, Packer N, Perrone G, Uresti-Rivera EE, Salamov A, Schmoll M, Seiboth B, Shapiro H, Sukno S, Tamayo-Ramos JA, Tisch D, Wiest A, Wilkinson HH,

- Zhang M, Coutinho PM, Kenerley CM, Monte E, Baker SE, Grigoriev IV. 2011. Comparative genome sequence analysis underscores mycoparasitism as the ancestral life style of *Trichoderma*. *Genome Biology* 12:R40-.
5. Shi-Kunne X, Seidl MF, Faino L, Thomma BPHJ. 2015. Draft genome sequence of a strain of cosmopolitan fungus *Trichoderma atroviride*. *Genome Announc* 3:e00287-15, /ga/3/3/e00287-15.atom.
  6. Baroncelli R, Zapparata A, Piaggieschi G, Sarrocco S, Vannacci G. Draft whole-genome sequence of *Trichoderma gamsii* T6085, a promising biocontrol agent of Fusarium Head Blight on wheat. *Genome Announcements* 2.
  7. Studholme DJ, Harris B, Le Cocq K, Winsbury R, Perera V, Ryder L, Ward JL, Beale MH, Thornton CR, Grant M. 2013. Investigating the beneficial traits of *Trichoderma hamatum* GD12 for sustainable agriculture—insights from genomics. *Front Plant Sci* 4.
  8. Compant S, Gerbore J, Antonielli L, Brutel A, Schmoll M. 2017. Draft genome sequence of the root-colonizing fungus *Trichoderma harzianum* B97. *Genome Announc* 5:e00137-17, /ga/5/13/e00137-17.atom.
  9. Baroncelli R, Piaggieschi G, Fiorini L, Bertolini E, Zapparata A, Pè ME, Sarrocco S, Vannacci G. 2015. Draft whole-genome sequence of the biocontrol agent *Trichoderma harzianum* T6776. *Genome Announc* 3:e00647-15, /ga/3/3/e00647-15.atom.
  10. Steindorff AS, Ramada MHS, Coelho ASG, Miller RNG, Pappas GJ, Ulhoa CJ, Noronha EF. 2014. Identification of mycoparasitism-related genes against the phytopathogen *Sclerotinia*

- sclerotiorum* through transcriptome and expression profile analysis in *Trichoderma harzianum*. BMC Genomics 15:204.
11. Castrillo ML, Bich GÁ, Modenutti C, Turjanski A, Zapata PD, Villalba LL. 2017. First whole-genome shotgun sequence of a promising cellulase secretor, *Trichoderma koningiopsis* strain POS7. Genome Announc 5:e00823-17, /ga/5/37/e00823-17.atom.
  12. Xie B-B, Qin Q-L, Shi M, Chen L-L, Shu Y-L, Luo Y, Wang X-W, Rong J-C, Gong Z-T, Li D, Sun C-Y, Liu G-M, Dong X-W, Pang X-H, Huang F, Liu W, Chen X-L, Zhou B-C, Zhang Y-Z, Song X-Y. 2014. Comparative genomics provide insights into evolution of *Trichoderma* nutrition style. Genome Biology and Evolution 6:379–390.
  13. Yang D, Pomraning K, Kopchinskiy A, Karimi Aghcheh R, Atanasova L, Chenthamara K, Baker SE, Zhang R, Shen Q, Freitag M, Kubicek CP, Druzhinina IS. 2015. Genome sequence and annotation of *Trichoderma parareesei*, the ancestor of the cellulase producer *Trichoderma reesei*. Genome Announc 3:e00885-15, /ga/3/4/e00885-15.atom.
  14. Kubicek CP, Steindorff AS, Chenthamara K, Manganiello G, Henrissat B, Zhang J, Cai F, Kopchinskiy AG, Kubicek EM, Kuo A, Baroncelli R, Sarrocco S, Noronha EF, Vannacci G, Shen Q, Grigoriev IV, Druzhinina IS. 2019. Evolution and comparative genomics of the most common *Trichoderma* species. BMC Genomics 20:485.
  15. Tisch D, Pomraning KR, Collett JR, Freitag M, Baker SE, Chen C-L, Hsu PW-C, Chuang YC, Schuster A, Dattenböck C, Stappler E, Sulyok M, Böhmendorfer S, Oberlerchner J, Wang T-F, Schmoll M. 2017. Omics analyses of *Trichoderma reesei* CBS999.97 and QM6a indicate the

- relevance of female fertility to carbohydrate-active enzyme and transporter levels. *Appl Environ Microbiol* 83:e01578-17, /aem/83/22/e01578-17.atom.
16. Martinez D, Berka RM, Henrissat B, Saloheimo M, Arvas M, Baker SE, Chapman J, Chertkov O, Coutinho PM, Cullen D, Danchin EGJ, Grigoriev IV, Harris P, Jackson M, Kubicek CP, Han CS, Ho I, Larrondo LF, de Leon AL, Magnuson JK, Merino S, Misra M, Nelson B, Putnam N, Robbertse B, Salamov AA, Schmoll M, Terry A, Thayer N, Westerholm-Parvinen A, Schoch CL, Yao J, Barabote R, Nelson MA, Detter C, Bruce D, Kuske CR, Xie G, Richardson P, Rokhsar DS, Lucas SM, Rubin EM, Dunn-Coleman N, Ward M, Brettin TS. 2008. Genome sequencing and analysis of the biomass-degrading fungus *Trichoderma reesei* (syn. *Hypocrea jecorina*). *Nat Biotechnol* 26:553–560.
  17. Liu P, Lin A, Zhang G, Zhang J, Chen Y, Shen T, Zhao J, Wei D, Wang W. 2019. Enhancement of cellulase production in *Trichoderma reesei* RUT-C30 by comparative genomic screening. *Microb Cell Fact* 18:81.
  18. Sherkhane PD, Bansal R, Banerjee K, Chatterjee S, Oulkar D, Jain P, Rosenfelder L, Elgavish S, Horwitz BA, Mukherjee PK. 2017. Genomics-driven discovery of the gliovirin biosynthesis gene cluster in the plant beneficial fungus *Trichoderma virens*. *ChemistrySelect* 2:3347–3352.
  19. Uzbas F, Sezerman U, Hartl L, Kubicek CP, Seiboth B. 2012. A homologous production system for *Trichoderma reesei* secreted proteins in a cellulase-free background. *Appl Microbiol Biotechnol* 93:1601–1608.
  20. Zhang J, Bayram Akcapinar G, Atanasova L, Rahimi MJ, Przylucka A, Yang D, Kubicek CP, Zhang

R, Shen Q, Druzhinina IS. 2016. The neutral metallopeptidase NMP1 of *Trichoderma guizhouense* is required for mycotrophy and self-defence: NMP1 of the fungicidal mould *Trichoderma guizhouense*. Environ Microbiol 18:580–597.
